# Supplementary material for: Magnetic polypyrrole/Fe3O4particles as an effective sorbent for the extraction of abamectin from fruit juices using magnetic solid-phase extraction combined with dispersive liquid–liquid microextraction
Source: Royal Society of Chemistry journal article supplement (doi:10.1039/c4ay03074e), 2015-01-01
Supplement: c4ay03074e1.pdf [file c4ay03074e1.pdf]

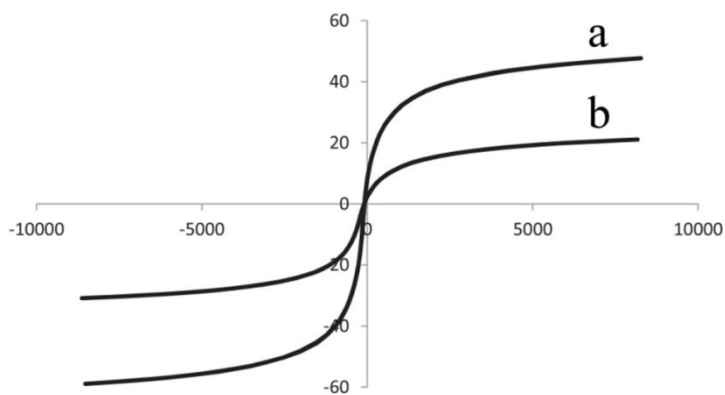

Magnetization curves of a) Fe<sub>3</sub>O<sub>4</sub> and b) PPy/Fe<sub>3</sub>O<sub>4</sub>

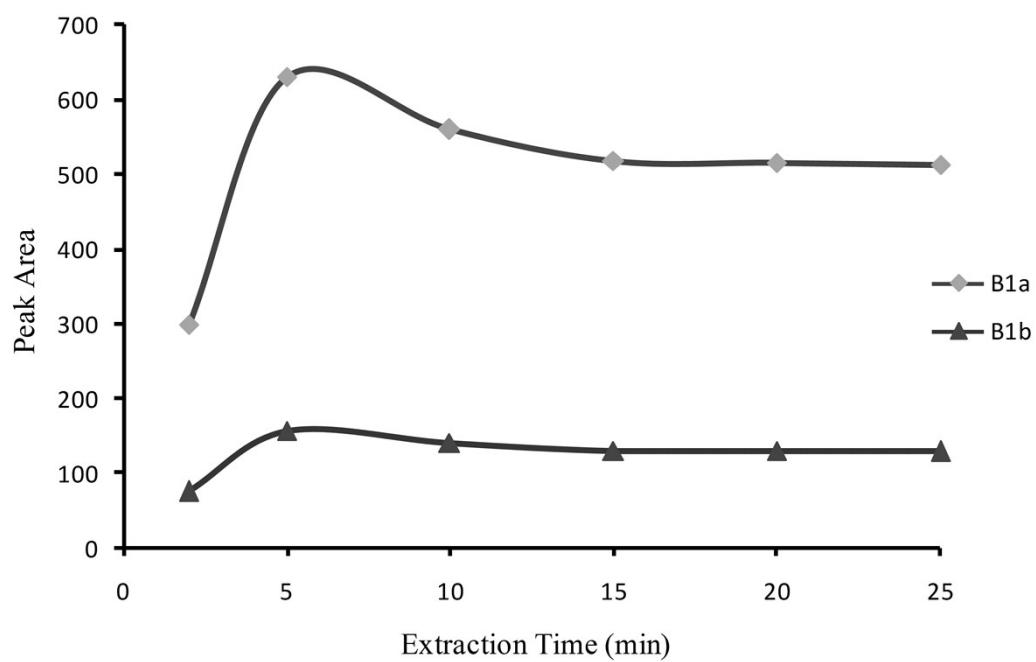

MSPE time profiles of avermectines B<sub>1a</sub> and B<sub>1b</sub> using PPy/MNP sorbent

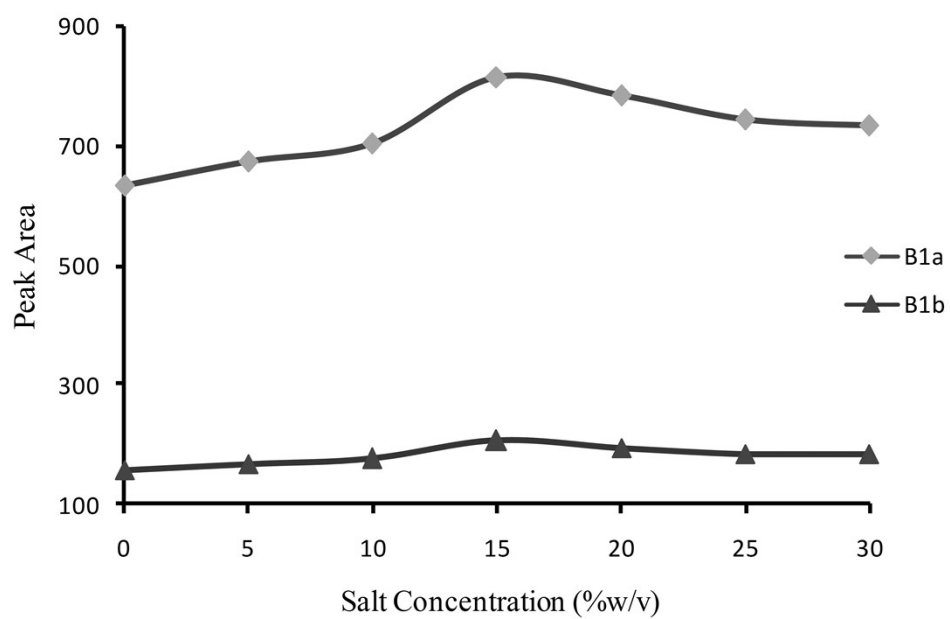

Effect of salt addition on MSPE efficiency

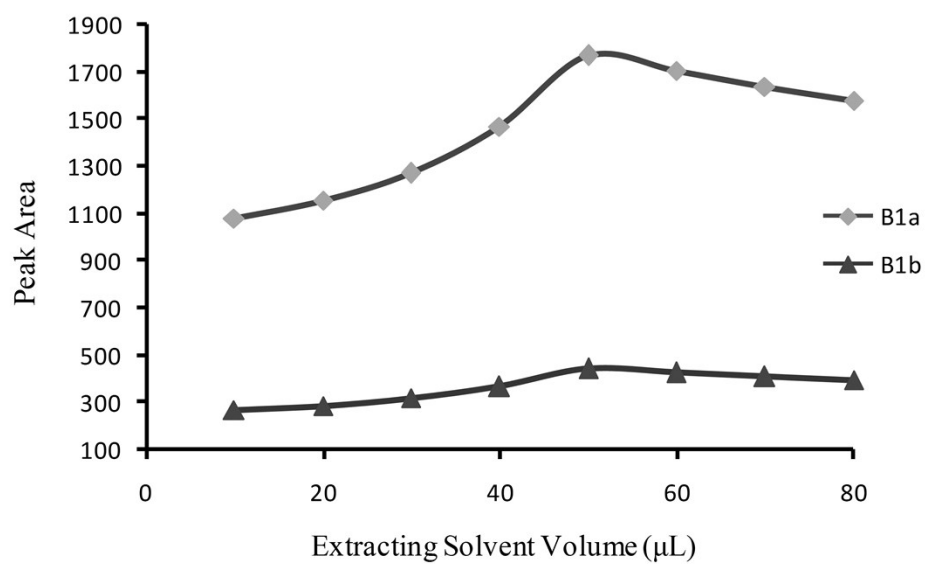

Effect of extracting solvent volume on the DLLME efficiency
